# Supplementary material for: Enhanced GATA4 expression in senescent systemic lupus erythematosus monocytes promotes high levels of IFNα production
Source: PubMed Central journal article supplement (PMC11007064; doi:10.3389/fimmu.2024.1320444), 2024-03-28
Supplement: DataSheet_2.pdf [file DataSheet_2.pdf]

**Supplementary table S1.****Characteristics of HC and patients with SLE in the RNA-seq analysis**

|                                          | Healthy controls | SLE              |
|------------------------------------------|------------------|------------------|
| Number, n                                | 5                | 5                |
| Females/males, n                         | 3/2              | 3/2              |
| Age, years, median (IQR)                 | 33.0 (28.5-52.5) | 30.0 (28.5-50.0) |
| Disease duration, years, median (IQR)    | -                | 1.8 (0.05-19.5)  |
| Medications                              |                  |                  |
| Medication naïve, n                      | -                | 2                |
| Prednisone, n                            | -                | 3                |
| Prednisone dose, mg/day, median (IQR)    | -                | 11.0 (10.0-20.0) |
| HCQ, n                                   | -                | 1                |
| Immunosuppressive agent <sup>a</sup> , n | -                | 2                |

---

IQR, interquartile range

<sup>a</sup>mycophenolate mofetil, tacrolimus, azathioprine

**Supplementary table S2.****Characteristics of HC and patients with SLE in the RT-PCR analysis**

|                                          | Healthy controls | SLE              |
|------------------------------------------|------------------|------------------|
| Number, n                                | 6                | 10               |
| Females/males, n                         | 5/1              | 9/1              |
| Age, years, median (IQR)                 | 37.5 (30.5-48.8) | 45.5 (35.3-50.0) |
| Disease duration, years, median (IQR)    | -                | 17 (4.0-24.0)    |
| Medications                              |                  |                  |
| Medication naïve, n                      | -                | 1                |
| Prednisone, n                            | -                | 9                |
| Prednisone dose, mg/day, median (IQR)    | -                | 7.75 (7.0-8.0)   |
| HCQ, n                                   | -                | 5                |
| Immunosuppressive agent <sup>a</sup> , n | -                | 4                |

---

IQR, interquartile range

<sup>a</sup>mycophenolate mofetil, tacrolimus

**Supplementary table S3.****Characteristics of HC and patients with SLE in SA- $\beta$ -Gal analysis**

|                                          | Healthy controls | SLE             |
|------------------------------------------|------------------|-----------------|
| Number, n                                | 6                | 10              |
| Females/males, n                         | 5/1              | 8/2             |
| Age, years, median (IQR)                 | 42 (31.3-53.3)   | 47 (37.0-60.0)  |
| Disease duration, years, median (IQR)    | -                | 1.8 (0.05-19.5) |
| Medications                              |                  |                 |
| Medication naïve, n                      | -                | 0               |
| Prednisone, n                            | -                | 10              |
| Prednisone dose, mg/day, median (IQR)    | -                | 4.8(3.4-5.8)    |
| HCQ, n                                   | -                | 3               |
| Immunosuppressive agent <sup>a</sup> , n | -                | 7               |

---

IQR, interquartile range

<sup>a</sup>mycophenolate mofetil, tacrolimus, azathioprine

**Supplementary table S4.**

**Primers used in this study for mRNA quantification.**

| Name   | Forward                  | Reverse                 |
|--------|--------------------------|-------------------------|
| GAPDH  | CAGTCAGCCGCATCTTCTTTTG   | GCGCCCAATACGACCAAAT     |
| CDKN2A | GAAGGTCCCTCAGACATCCC     | GGACCTTCGGTGACTGATGA    |
| GATA4  | GTCATCTCACTACGGGCACA     | TAGCCTTGTGGGGAGAGCTT    |
| IFNA1  | GGAGGAAGGAATAACATCTGGTCC | GCAGGGGTGAGAGTCTTTGAA   |
| IFNB1  | GCTCTGGCACAACAGGTAG      | TAGTGGAGAAGCACAACAGG    |
| IFIT1  | GCCTCCTTGGGTTTCGTCTATAA  | TCAAAGTCAGCAGCCAGTCTCA  |
| IFIT2  | CACTGCAACCATGAGTGAGAACA  | AGATAGGCCAGTAGGTTGCAC   |
| IFIT3  | GGCAGTCATGAGTGAGGTC      | TGAATAAGTTCAGGTGAAATGGC |

**Supplementary table S5.****Publicly-available ChIP-seq datasets, which were processed and obtained from the ChIP-Atlas database in Supplementary figure S3A.**

|    | Accession No. | Sample               | Cell         | ChIP_antibody | Source_publication                                                               |
|----|---------------|----------------------|--------------|---------------|----------------------------------------------------------------------------------|
| 1  | GSM2262943    | RPMI_1h_rep1_H3K4me1 | Monocyte     | H3K4me1       | Novakovic, et al. Cell 167, 1354–1368 (2016)                                     |
| 2  | GSM2262941    | LPS_1h_rep1_H3K4me1  | Monocyte     | H3K4me1       | Novakovic, et al. Cell 167, 1354–1368 (2016)                                     |
| 3  | GSM2262948    | RPMI_4h_rep1_H3K4me1 | Monocyte     | H3K4me1       | Novakovic, et al. Cell 167, 1354–1368 (2016)                                     |
| 4  | GSM2263049    | LPS_4h_rep1_H3K4me1  | Monocyte     | H3K4me1       | Novakovic, et al. Cell 167, 1354–1368 (2016)                                     |
| 5  | GSM2263026    | RPMI_1h_rep1_H3K27ac | Monocyte     | H3K27ac       | Novakovic, et al. Cell 167, 1354–1368 (2016)                                     |
| 6  | GSM2262923    | LPS_1h_rep1_H3K27ac  | Monocyte     | H3K27ac       | Novakovic, et al. Cell 167, 1354–1368 (2016)                                     |
| 7  | GSM2263019    | RPMI_4h_rep1_H3K27ac | Monocyte     | H3K27ac       | Novakovic, et al. Cell 167, 1354–1368 (2016)                                     |
| 8  | GSM2263011    | LPS_4h_rep1_H3K27ac  | Monocyte     | H3K27ac       | Novakovic, et al. Cell 167, 1354–1368 (2016)                                     |
| 9  | GSM2262926    | RPMI_1h_rep1_H3K4me3 | Monocyte     | H3K4me3       | Novakovic, et al. Cell 167, 1354–1368 (2016)                                     |
| 10 | GSM2262987    | LPS_1h_rep1_H3K4me3  | Monocyte     | H3K4me3       | Novakovic, et al. Cell 167, 1354–1368 (2016)                                     |
| 11 | GSM2262976    | RPMI_4h_rep1_H3K4me3 | Monocyte     | H3K4me3       | Novakovic, et al. Cell 167, 1354–1368 (2016)                                     |
| 12 | GSM2263038    | LPS_4h_rep1_H3K4me3  | Monocyte     | H3K4me3       | Novakovic, et al. Cell 167, 1354–1368 (2016)                                     |
| 13 | GSM1250896    | AGS GATA4            | AGS cellline | GATA4         | Chia N, Deng N, Das K, et al. Gut 64, 707-719 (2015)                             |
| 14 | GSM2430676    | GATA4 ChIP           | BJFOXA2 line | GATA4         | Donaghey J, Thakurela S, Charlton J, Chen JS et al. Nat Genet 50, 250-258 (2018) |
